# Supplementary material for: How are systematic reviews of prevalence conducted? A methodological study
Source: Springer Nature journal article supplement (doi:10.1186/s12874-020-00975-3), 2020-04-26
Supplement: MOESM2 [file 17929782]

**Additional file 2: List of full text excluded with reasons**

| <b>Author, year</b>               | <b>Reason for exclusion</b>                                      |
|-----------------------------------|------------------------------------------------------------------|
| <b>Chapman, 2017 (1)</b>          | Study assessed the association between variables, not prevalence |
| <b>Cooney, 2017 (2)</b>           | Study assessed the association between variables, not prevalence |
| <b>Eusebi, 2018 (3)</b>           | Study assessed the association between variables, not prevalence |
| <b>Fuccio, 2017 (4)</b>           | Unit of measurement was not patients                             |
| <b>Goodarzi, 2017 (5)</b>         | Study assessed the association between variables, not prevalence |
| <b>Goyal, 2017 (6)</b>            | Unit of measurement was not patients                             |
| <b>Haegglom, 2017 (7)</b>         | Study assessed the association between variables, not prevalence |
| <b>Kurin, 2018 (8)</b>            | Study assessed the association between variables, not prevalence |
| <b>Nokhodian, 2017 (9)</b>        | Unit of measurement was not patients                             |
| <b>Pereira-Miranda, 2017 (10)</b> | Study assessed the association between variables, not prevalence |
| <b>Prioreschi, 2017 (11)</b>      | Study assessed the association between variables, not prevalence |
| <b>Ross, 2017 (12)</b>            | Study assessed the association between variables, not prevalence |
| <b>Verlaan, 2017 (13)</b>         | Study assessed the association between variables, not prevalence |
| <b>Wang, 2017 (14)</b>            | Full text not found                                              |
| <b>Wang, 2017 (15)</b>            | Study assessed the association between variables, not prevalence |
| <b>Ziukaite, 2017 (16)</b>        | Study assessed the association between variables, not prevalence |

## References:

1. Chapman, C., Slade, T., Swift, W., Keyes, K., Tonks, Z. and Teesson, M. (2017). Evidence for Sex Convergence in Prevalence of Cannabis Use: A Systematic Review and Meta-Regression. *Journal of Studies on Alcohol and Drugs*, 78(3), pp.344-352.
2. Cooney, L., Lee, I., Sammel, M. and Dokras, A. (2017). High prevalence of moderate and severe depressive and anxiety symptoms in polycystic ovary syndrome: a systematic review and meta-analysis. *Human Reproduction*, 32(5), pp.1075-1091.
3. Eusebi, L., Ratnakumaran, R., Bazzoli, F. and Ford, A. (2018). Prevalence of Dyspepsia in Individuals With Gastroesophageal Reflux-Type Symptoms in the Community: A Systematic Review and Meta-analysis. *Clinical Gastroenterology and Hepatology*, 16(1), pp.39-48.e1.
4. Fuccio, L., Repici, A., Hassan, C., Ponchon, T., Bhandari, P., Jover, R., Triantafyllou, K., Mandolesi, D., Frazzoni, L., Bellisario, C., Bazzoli, F., Sharma, P., Rösch, T. and Rex, D. (2017). Why attempt en bloc resection of non-pedunculated colorectal adenomas? A systematic review of the prevalence of superficial submucosal invasive cancer after endoscopic submucosal dissection. *Gut*, 67(8), pp.1464-1474.
5. Mahvi, A., Goodarzi, F., Hosseini, M., Nodehi, R., Kharazifard, M. and Parvizishad, M. (2017). Prevalence of dental caries and fluoride concentration of drinking water: A systematic review. *Dental Research Journal*, 14(3), p.163.
6. Goyal, V., Kadam, V., Narang, P. and Singh, V. (2017). Prevalence of drug-resistant pulmonary tuberculosis in India: systematic review and meta-analysis. *BMC Public Health*, 17(1).
7. Haegglblom, L., Ramqvist, T., Tommasino, M., Dalianis, T. and Näsman, A. (2017). Time to change perspectives on HPV in oropharyngeal cancer. A systematic review of HPV prevalence per oropharyngeal sub-site the last 3 years. *Papillomavirus Research*, 4, pp.1-11.
8. Kurin, M., Bielefeldt, K. and Levinthal, D. (2018). Prevalence of Nausea and Vomiting in Adults Using Ropinirole: A Systematic Review and Meta-Analysis. *Digestive Diseases and Sciences*, 63(3), pp.687-693.
9. Ataei, B., Nokhodian, Z., Feizi, A., Hoseini, S. and Mostafavi, E. (2017). Epidemiology of Q fever in Iran: A systematic review and meta-analysis for estimating serological and molecular prevalence. *Journal of Research in Medical Sciences*, 22(1), p.121.
10. Pereira-Miranda, E., Costa, P., Queiroz, V., Pereira-Santos, M. and Santana, M. (2017). Overweight and Obesity Associated with Higher Depression Prevalence in Adults: A Systematic Review and Meta-Analysis. *Journal of the American College of Nutrition*, 36(3), pp.223-233.
11. Prioreshi, A., Munthali, R., Soepnel, L., Goldstein, J., Micklesfield, L., Aronoff, D. and Norris, S. (2017). Incidence and prevalence of type 2 diabetes mellitus with HIV infection in Africa: a systematic review and meta-analysis. *BMJ Open*, 7(3), p.e013953.
12. Ross, L., Salway, T., Tarasoff, L., MacKay, J., Hawkins, B. and Fehr, C. (2017). Prevalence of Depression and Anxiety Among Bisexual People Compared to Gay, Lesbian, and Heterosexual Individuals: A Systematic Review and Meta-Analysis. *The Journal of Sex Research*, 55(4-5), pp.435-456.

13. Verlaan, S., Ligthart-Melis, G., Wijers, S., Cederholm, T., Maier, A. and de van der Schueren, M. (2017). High Prevalence of Physical Frailty Among Community-Dwelling Malnourished Older Adults—A Systematic Review and Meta-Analysis. *Journal of the American Medical Directors Association*, 18(5), pp.374-382.
14. Goodarzi, F., Hossein Mahvi, A., Hosseini, M., Nabizadeh Nodehi, R., Javad Kharazifard, M. and Parvizishad, M. (2019). Prevalence of Bicuspid Aortic Valve in Chinese Patients with Aortic Valve Disease: A Systematic Review. 14(3), pp.163-8.
15. Wang, S., Chen, Y., Xu, X., Hu, W., Shen, H. and Chen, J. (2017). Prevalence of hepatitis B virus and hepatitis C virus infection in patients with systemic lupus erythematosus: a systematic review and meta-analysis. *Oncotarget*, 8(60).
16. Ziukaite, L., Slot, D. and Van der Weijden, F. (2018). Prevalence of diabetes mellitus in people clinically diagnosed with periodontitis: A systematic review and meta-analysis of epidemiologic studies. *Journal of Clinical Periodontology*, 45(6), pp.650-662.
