# Supplementary material for: How are systematic reviews of prevalence conducted? A methodological study
Source: Springer Nature journal article supplement (doi:10.1186/s12874-020-00975-3), 2020-04-26
Supplement: MOESM3 [file 17929782]

|       |                                                                                                                                          |   |     |    |            |   |                                                                                                    |                                                                                                                                               |                         |                   |     |     |    |     |     |                |    |     |     |     |     |     |     |                                        |                              |        |
|-------|------------------------------------------------------------------------------------------------------------------------------------------|---|-----|----|------------|---|----------------------------------------------------------------------------------------------------|-----------------------------------------------------------------------------------------------------------------------------------------------|-------------------------|-------------------|-----|-----|----|-----|-----|----------------|----|-----|-----|-----|-----|-----|-----|----------------------------------------|------------------------------|--------|
| Wu    | Prevalence of abdominal artery calcification in elderly patients with non-atherosclerotic disease: a systematic review and meta-analysis | 5 | Yes | NA | Yes        | 5 | Cochrane Database<br>Web of Science                                                                | Study selection: two independent reviewers<br>Data extraction: two independent reviewers                                                      | BMJ<br>2024;379:e075952 | PRISMA<br>MEDLINE | Yes | Yes | NA | Yes | NA  | Random effects | RR | Yes | Yes | Yes | Yes | Yes | Yes | I <sup>2</sup>                         | Hedge's test<br>Egger's test | CI-MMA |
| Zheng | Prevalence of depression and anxiety in patients with type 2 diabetes mellitus: a systematic review and meta-analysis                    | 5 | Yes | NA | Yes        | 4 | Cochrane Database<br>PubMed<br>PsycInfo                                                            | Title and abstract screening: two independent reviewers<br>Full-text eligibility: two reviewers<br>Data extraction: two independent reviewers | BMJ<br>2024;379:e075422 | PRISMA<br>MEDLINE | Yes | No  | NA | Yes | Yes | Random effects | RR | Yes | Yes | Yes | Yes | Yes | Yes | I <sup>2</sup><br>sensitivity analysis | Hedge's test<br>Forest plot  | CI-MMA |
| Zheng | The prevalence of depression and depression symptoms among eye disease patients: a systematic review and meta-analysis                   | 4 | Yes | NA | Yes        | 4 | Cochrane Database<br>Web of Science<br>PubMed                                                      | Search: two independent reviewers                                                                                                             | BMJ<br>2024;379:e075422 | PRISMA<br>MEDLINE | Yes | No  | NA | Yes | Yes | Random effects | RR | Yes | Yes | Yes | Yes | Yes | Yes | I <sup>2</sup><br>sensitivity analysis | Hedge's test<br>Forest plot  | CI-MMA |
| Zhou  | Prevalence, risk factors, and prognosis of retinopathy in patients with diabetes mellitus: a systematic review and meta-analysis         | 4 | Yes | NA | Incomplete | 5 | Cochrane Database<br>Web of Science<br>PubMed<br>PsycInfo<br>JIF Chinese Journal<br>Web of Science | Search: two independent reviewers<br>Data extraction: two independent reviewers                                                               | BMJ<br>2024;379:e075422 | PRISMA<br>MEDLINE | Yes | No  | NA | Yes | Yes | Random effects | RR | Yes | Yes | Yes | Yes | Yes | Yes | I <sup>2</sup><br>sensitivity analysis | Hedge's test<br>Forest plot  | CI-MMA |
