# Supplementary material for: How are systematic reviews of prevalence conducted? A methodological study
Source: Springer Nature journal article supplement (doi:10.1186/s12874-020-00975-3), 2020-04-26
Supplement: MOESM4 [file 17929782]

**Additional file 4: Journals of publication of included systematic reviews**

| <b>Journal</b>                                 | <b>Number of reviews</b> |
|------------------------------------------------|--------------------------|
| PLoS One                                       | 8                        |
| BMJ Open                                       | 7                        |
| Lancet Global Health                           | 5                        |
| Medicine                                       | 5                        |
| Sleep Medicine Reviews                         | 4                        |
| International Journal of STDs and AIDS         | 3                        |
| Journal of affective disorders                 | 3                        |
| Oncotarget                                     | 3                        |
| Scientific Reports - Nature                    | 3                        |
| Seminars in Arthritis and Rheumatism           | 3                        |
| Archives of Gynecology and Obstetrics          | 2                        |
| BMC Musculoskeletal Disorders                  | 2                        |
| BMC Psychiatry                                 | 2                        |
| Clinical Oral Investigations                   | 2                        |
| Critical Reviews in Food Science and Nutrition | 2                        |
| Developmental Medicine & Child Neurology       | 2                        |
| Diabetic Medicine                              | 2                        |
| Gastroenterology                               | 2                        |
| International Journal of Ophthalmology         | 2                        |
| International Journal of Surgery               | 2                        |
| International Urology and Nephrology           | 2                        |
| Journal of Global Health                       | 2                        |
| Journal of Hypertension                        | 2                        |
| Journal of Pain                                | 2                        |
| Nutrients                                      | 2                        |
| Rheumatology (Oxford)                          | 2                        |
| Rheumatology International                     | 2                        |
| Acta Neurochirurgic                            | 1                        |
| Acta Obstetricia et Gynecologica Scandinavica  | 1                        |
| Acta Odontologica Scandinavica                 | 1                        |
| Advances in Pediatric Research                 | 1                        |
| Aesthetic Plastic Surgery                      | 1                        |
| Aging & Mental Health                          | 1                        |
| Air Medical Journal                            | 1                        |
| Allergy                                        | 1                        |
| Am J Geriatr Psychiatry                        | 1                        |
| American Journal of Emergency Medicine         | 1                        |

|                                                            |   |
|------------------------------------------------------------|---|
| American Journal of Infection Control                      | 1 |
| Annals of Plastic Surgery                                  | 1 |
| Annals of Surgery                                          | 1 |
| Applied Ergonomics                                         | 1 |
| Archives of Iranian medicine                               | 1 |
| Archives of Orthopaedic and Trauma Surgery                 | 1 |
| Archives of Psychiatric Nursing                            | 1 |
| Archives of Public Health                                  | 1 |
| Archives of Women's Mental Health                          | 1 |
| Asia Pacific Journal of Clinical Nutrition                 | 1 |
| Basic and Clinical Neuroscience                            | 1 |
| Biochemistry and Cell Biology                              | 1 |
| Birth Defects Research                                     | 1 |
| BMC Health Services Research                               | 1 |
| BMC Hematology                                             | 1 |
| BMC Infectious Diseases                                    | 1 |
| BMC Medical Education                                      | 1 |
| BMC Medical Genetics                                       | 1 |
| BMC Nursing                                                | 1 |
| BMC Pregnancy Childbirth                                   | 1 |
| BMC Pulmonary Medicine                                     | 1 |
| BMJ Open Sport & Exercise Medicine                         | 1 |
| British Journal of Dermatology                             | 1 |
| British Journal of Sports Medicine                         | 1 |
| Burns                                                      | 1 |
| Chest                                                      | 1 |
| Chiropractic & Manual Therapies                            | 1 |
| Cleft Palate–Craniofacial Journal                          | 1 |
| Clinical and Experimental Rheumatology                     | 1 |
| Clinical Gastroenterology and Hepatology                   | 1 |
| Clinical Nursing Research                                  | 1 |
| Clinical Nutrition                                         | 1 |
| Clinical Psychology Review                                 | 1 |
| Clinical Respiratory Journal                               | 1 |
| Current HIV Research                                       | 1 |
| Diabetes & Metabolic Syndrome: Clinical Research & Reviews | 1 |
| Diabetes Research and Clinical Practice                    | 1 |
| Drug and Alcohol Dependence                                | 1 |
| Drug and Alcohol Review                                    | 1 |
| Dysphagia                                                  | 1 |
| Electronic Physician                                       | 1 |
| Epidemiology & Infection                                   | 1 |

|                                                                      |   |
|----------------------------------------------------------------------|---|
| Epidemiology and Health                                              | 1 |
| European Journal of Clinical Microbiology & Infectious Diseases      | 1 |
| European Journal of Clinical Pharmacology                            | 1 |
| European Journal of Gastroenterology & Hepatology                    | 1 |
| European Journal of Obstetrics & Gynecology and Reproductive Biology | 1 |
| European Journal of Pain                                             | 1 |
| European Journal of Surgical Oncology                                | 1 |
| European Urology                                                     | 1 |
| Expert Review Cardiovascular Therapy                                 | 1 |
| Frontiers in Psychiatry                                              | 1 |
| Frontiers in psychology                                              | 1 |
| Harvard Review of Psychiatry                                         | 1 |
| Heart Views                                                          | 1 |
| Helicobacter                                                         | 1 |
| Human Reproduction Update                                            | 1 |
| Indian Journal of Medical Microbiology                               | 1 |
| Indian Journal of Medical Research                                   | 1 |
| Intellectual and Developmental Disabilities                          | 1 |
| International Archives of Occupational and Environmental Health      | 1 |
| International Journal of Cardiology                                  | 1 |
| International Journal of Geriatric Psychiatry                        | 1 |
| International Journal of Infectious Diseases                         | 1 |
| International Journal of Molecular Sciences                          | 1 |
| International Journal of Otolaryngology                              | 1 |
| International Journal of Reproductive Biomedicine                    | 1 |
| International Nursing Review                                         | 1 |
| International Psychogeriatric Association                            | 1 |
| International Society of Behavioral Medicine                         | 1 |
| Iranian Journal of Child Neurology                                   | 1 |
| Iranian Journal of Kidney Diseases                                   | 1 |
| Iranian Journal of Neurology                                         | 1 |
| Iranian Journal of Public Health                                     | 1 |
| JAMA Pediatrics                                                      | 1 |
| JAMA Surgery                                                         | 1 |
| JBI Database of Systematic Reviews and Implementation Reports        | 1 |
| Journal of Antimicrobial Chemotherapy                                | 1 |
| Journal of Caring Sciences                                           | 1 |
| Journal of Clinical and Diagnostic Research for doctors              | 1 |
| Journal of Cranio-Maxillo-Facial Surgery                             | 1 |
| Journal of Critical Care                                             | 1 |
| Journal of Crohn's and Colitis                                       | 1 |
| Journal of Diabetes & Metabolic Disorders                            | 1 |

|                                                                |   |
|----------------------------------------------------------------|---|
| Journal of Diabetes Investigation                              | 1 |
| Journal of Eating Disorders                                    | 1 |
| Journal of Epidemiology                                        | 1 |
| Journal of Evidence Based Medicine                             | 1 |
| Journal of Gambling Studies                                    | 1 |
| Journal of Global Antimicrobial Resistance                     | 1 |
| Journal of Head Trauma Rehabilitation                          | 1 |
| Journal of Helminthology                                       | 1 |
| Journal of Injury and Violence Research                        | 1 |
| Journal of Neurosurgery                                        | 1 |
| Journal of Otolaryngology- Head & Neck Surgery                 | 1 |
| Journal of Pediatrics                                          | 1 |
| Journal of Research in Medical Scien                           | 1 |
| Journal of Substance Abuse Treatment                           | 1 |
| Journal of the American Society of Hypertension                | 1 |
| Journal of the European Academy of Dermatology and Venereology | 1 |
| Journal of Tropical Pediatrics                                 | 1 |
| Journal of Voice                                               | 1 |
| Journal Wound Care                                             | 1 |
| Lancet                                                         | 1 |
| Lancet Gastroenterology & Hepatology                           | 1 |
| Lancet HIV                                                     | 1 |
| Lancet Public Health                                           | 1 |
| Materia Socio Medica                                           | 1 |
| Maturitas                                                      | 1 |
| Menopause                                                      | 1 |
| Microbial Pathogenesis                                         | 1 |
| Middle East African Journal of Ophthalmology                   | 1 |
| Minerva Urologica e Nefrologica                                | 1 |
| Multiple Sclerosis and Related Disorders                       | 1 |
| Neuropathology and Applied Neurobiology                        | 1 |
| Neuropsychiatric Disease and Treatment                         | 1 |
| Neurourology and Urodynamics                                   | 1 |
| Osong Public Health and Research Perspectives                  | 1 |
| Pain                                                           | 1 |
| Pain Management                                                | 1 |
| Pain Medicine                                                  | 1 |
| Pain Physician                                                 | 1 |
| Parasites & Vectors                                            | 1 |
| Parasitology                                                   | 1 |
| Pediatric Blood Cancer                                         | 1 |
| Pediatric Infectious Disease Journal                           | 1 |

|                                                      |   |
|------------------------------------------------------|---|
| Pediatric Research                                   | 1 |
| Psychiatry Research                                  | 1 |
| Psychooncology                                       | 1 |
| Reproductive Toxicology                              | 1 |
| Research in Nursing & Health                         | 1 |
| Respirology                                          | 1 |
| Retina                                               | 1 |
| Revista da Sociedade Brasileira de Medicina Tropical | 1 |
| Seminars in Liver Disease                            | 1 |
| Social Psychiatry and Psychiatric Epidemiology       | 1 |
| Spine                                                | 1 |
| Sports Medicine                                      | 1 |
| Support Care Cancer                                  | 1 |
| Systematic Reviews                                   | 1 |
| The American Journal of Sports Medicine              | 1 |
| The British Journal of Psychiatry                    | 1 |
| Transfusion and Apheresis Science                    | 1 |
| Tropical Medicine & International Health             | 1 |
| Virologia sinica                                     | 1 |
| Wellcome Open Research                               | 1 |
| Wiener klinische Wochenschrift                       | 1 |
